# Supplementary material
Source: PubMed Central journal article supplement (PMC4782116)
Supplement: supp_WNL.0000000000002447_Figure_e-2.pdf [file supp_WNL.0000000000002447_Figure_e-2.pdf]

Figure e-2: Writing Sample - the tasks starts at #1

- |                        |                                                        |
|------------------------|--------------------------------------------------------|
| 1) The pig is fat      | 7) I can catch this ball                               |
| 2) This ball is big    | 8) This ball is cool                                   |
| 3) The bell is ringing | 9) The TV is not working                               |
| 4) The boy is<br>happy | 10) The nail is very sharp                             |
| 5) The girl<br>is sad  | 11) The clock tells us will<br>tell us what's the time |
| 6) My soup is hot.     |                                                        |
