# Supplementary material
Source: PubMed Central journal article supplement (PMC4782116)
Supplement: supp_WNL.0000000000002447_Video_legends.pdf [file supp_WNL.0000000000002447_Video_legends.pdf]

## Video Legends

Video-legend for Video e-1:

Reading sample as part of formal neuropsychological testing

Video-legend for Video e-2:

Motor sequence with concordant video-EEG recording as part of formal neuropsychological testing
