# Supplementary material
Source: PubMed Central journal article supplement (PMC4782116)

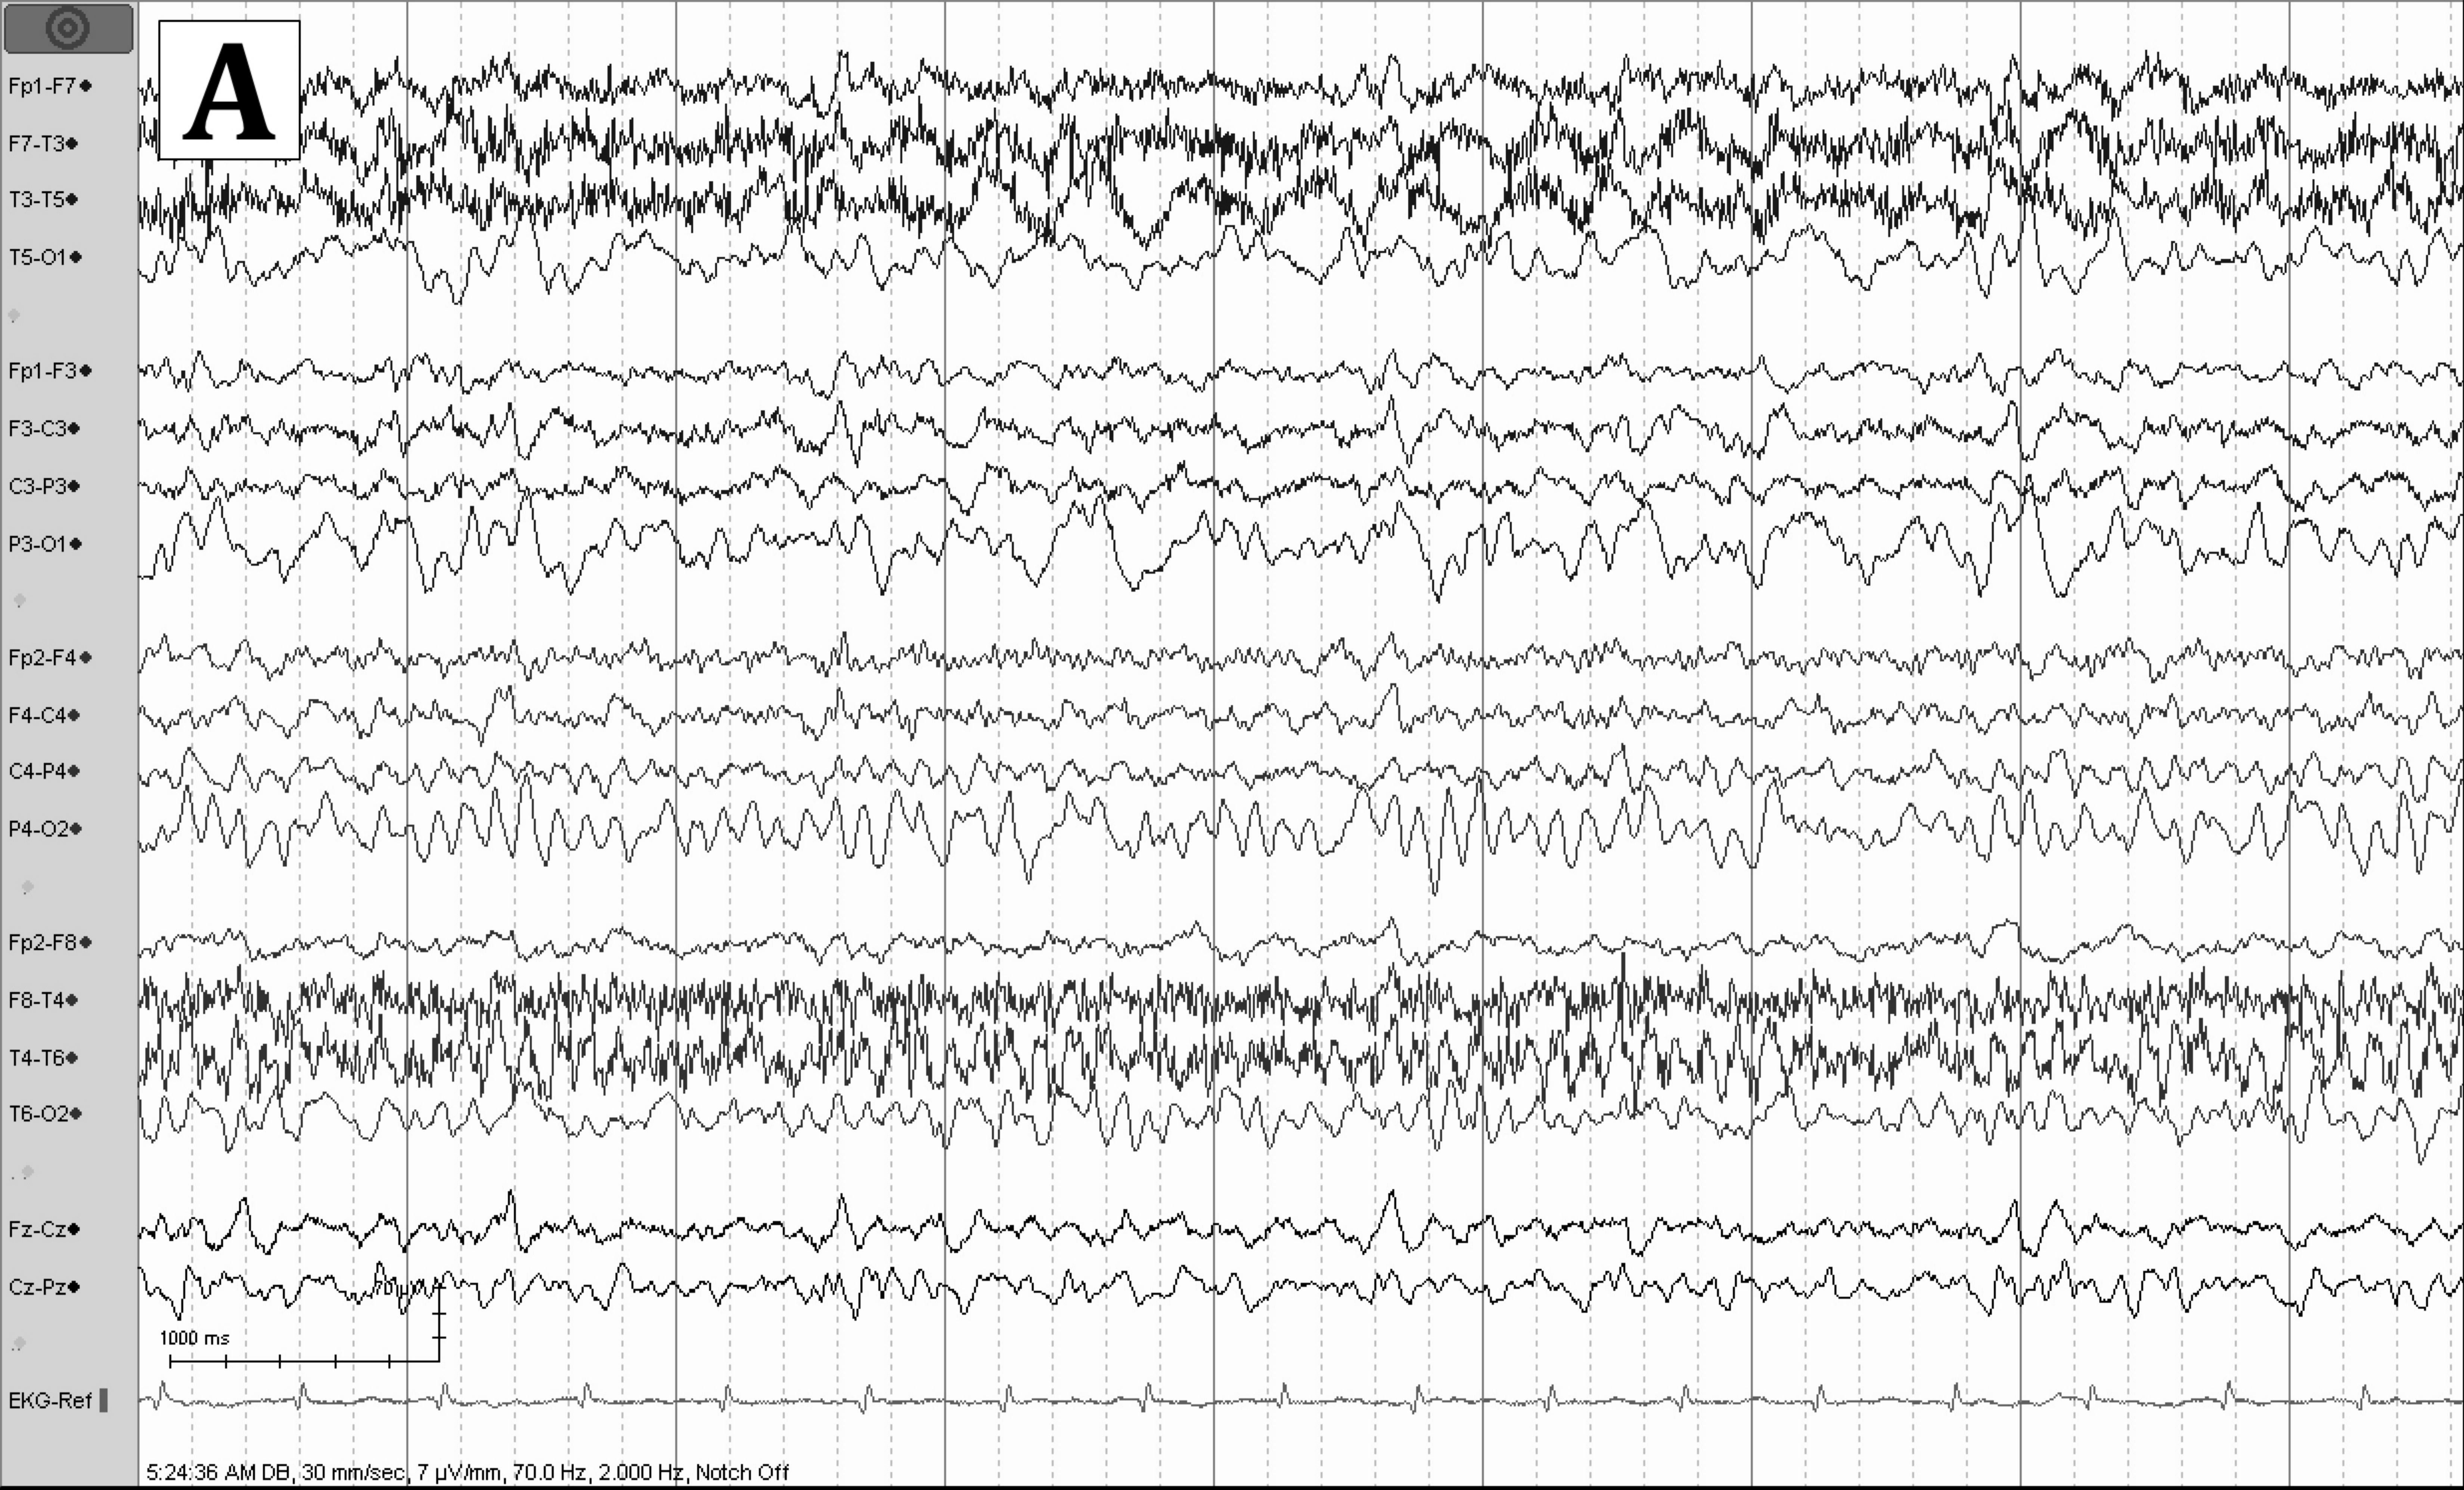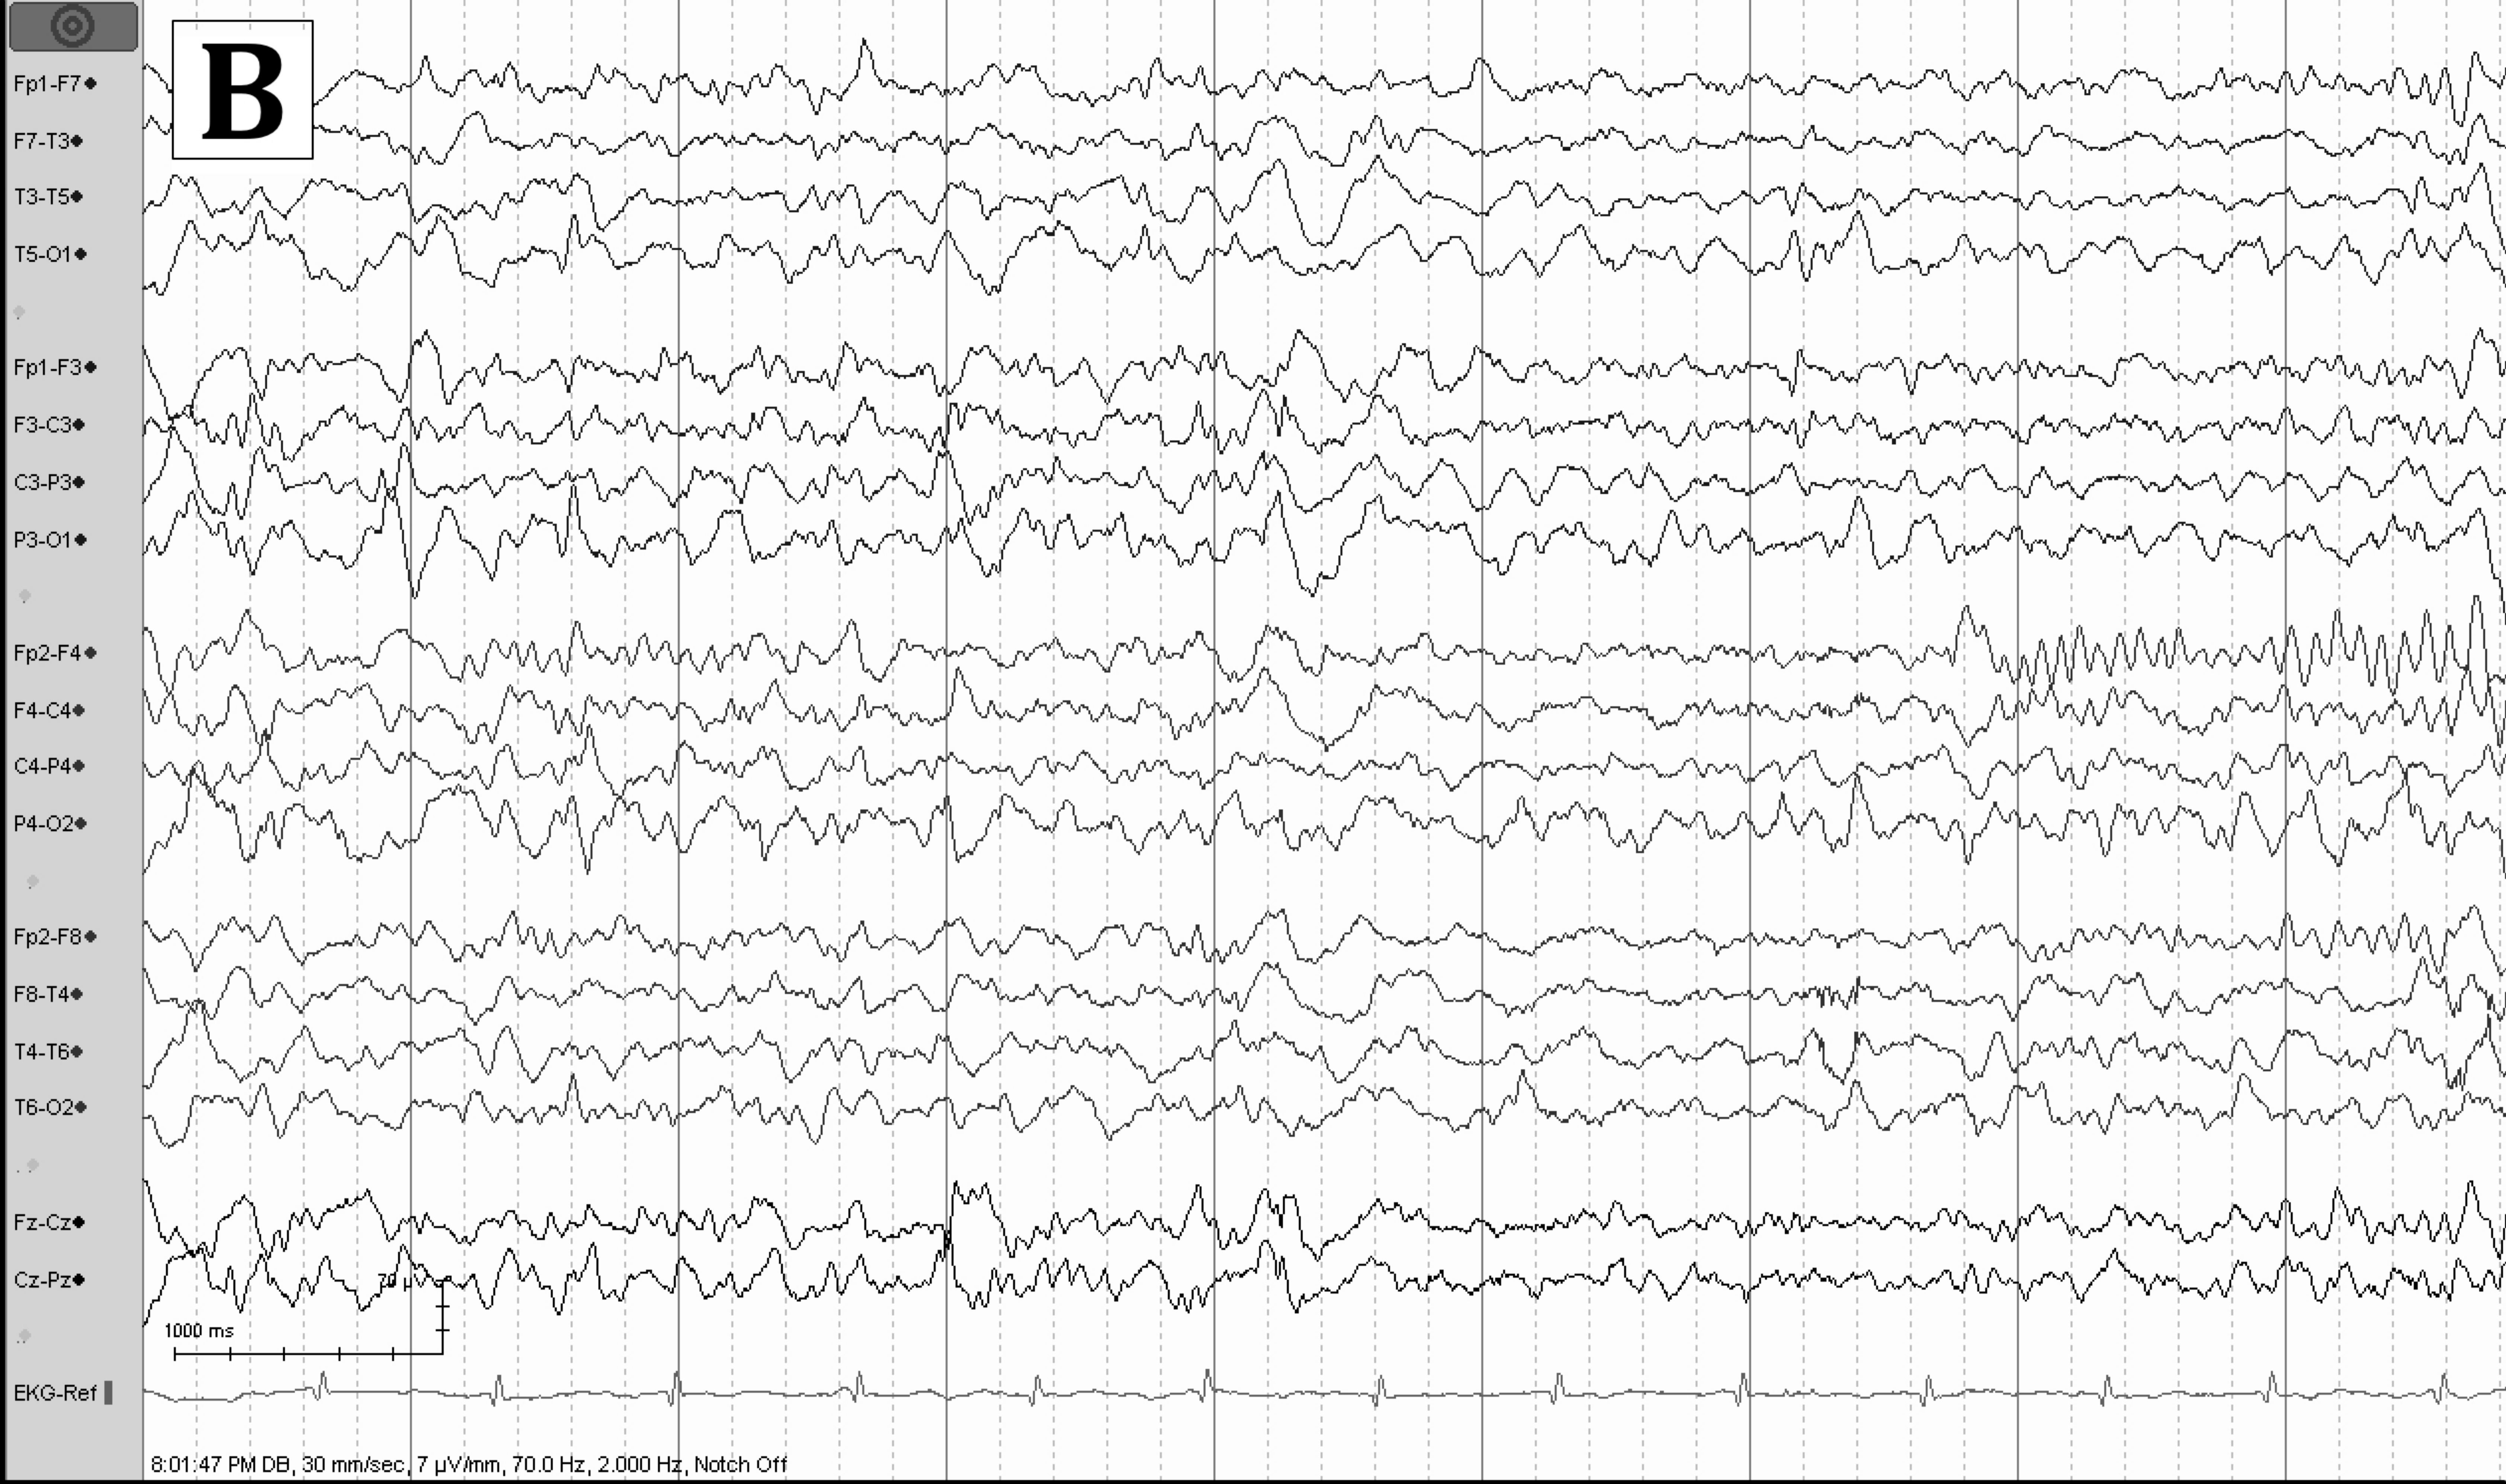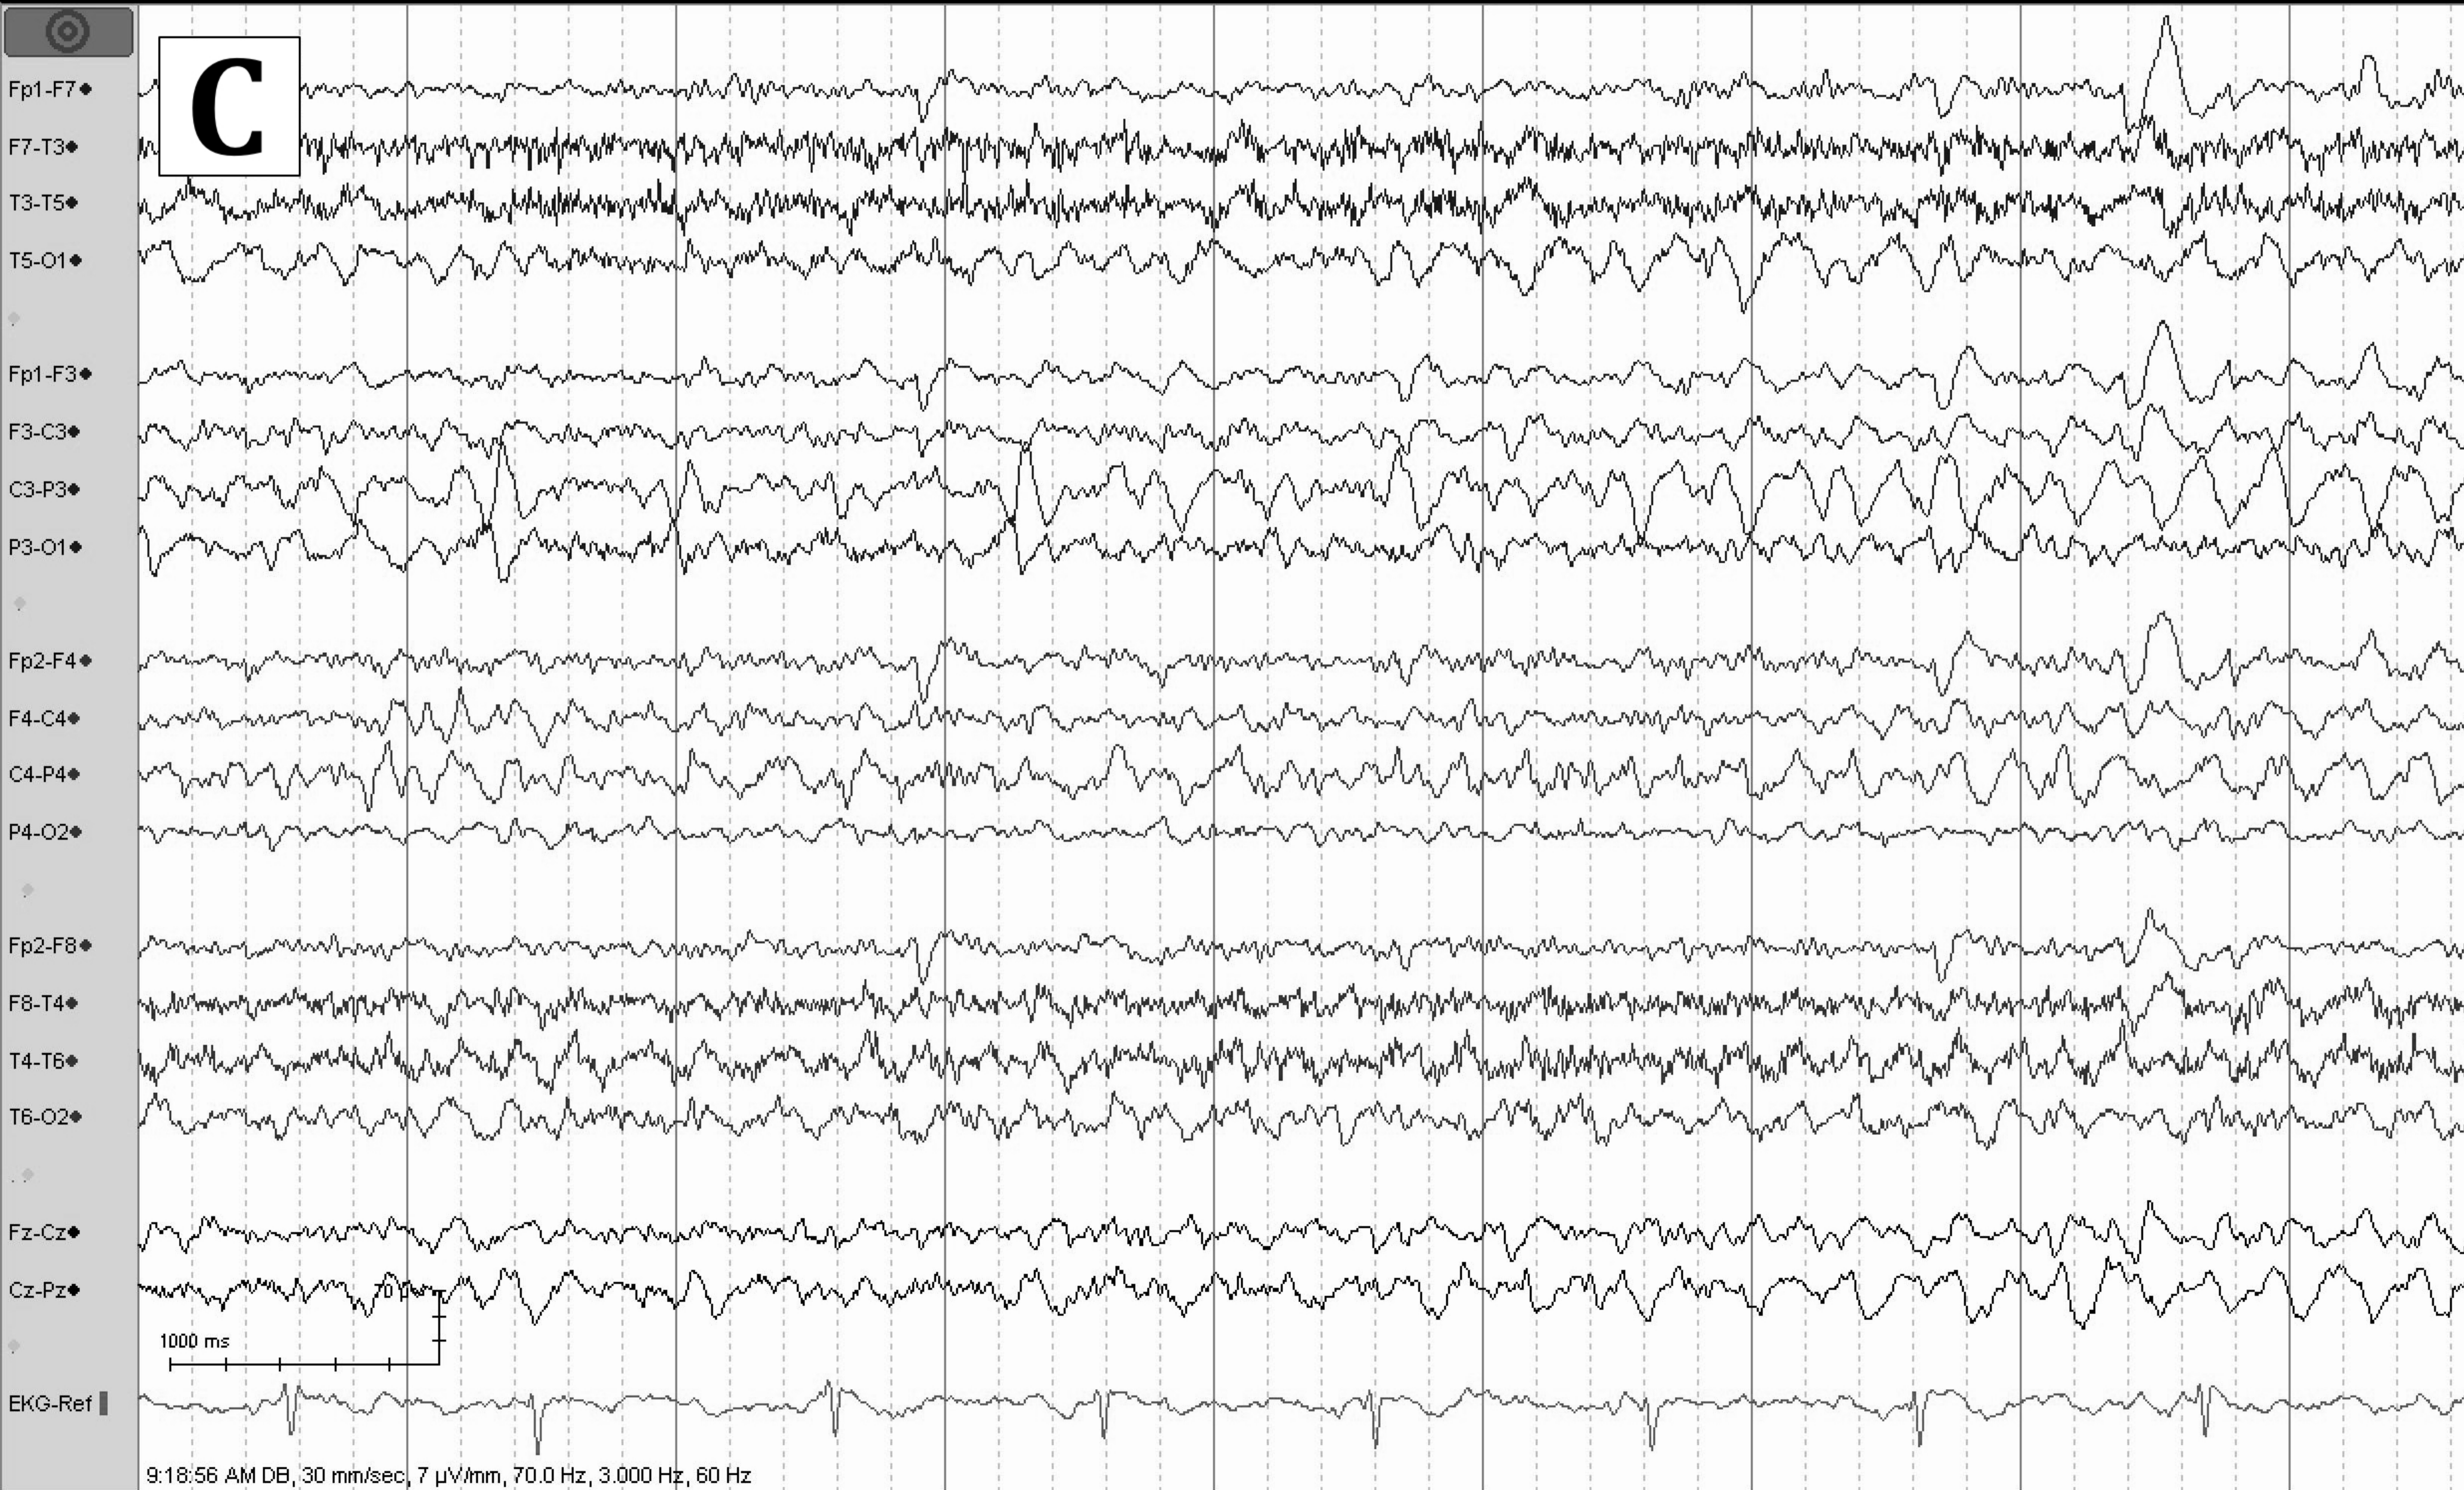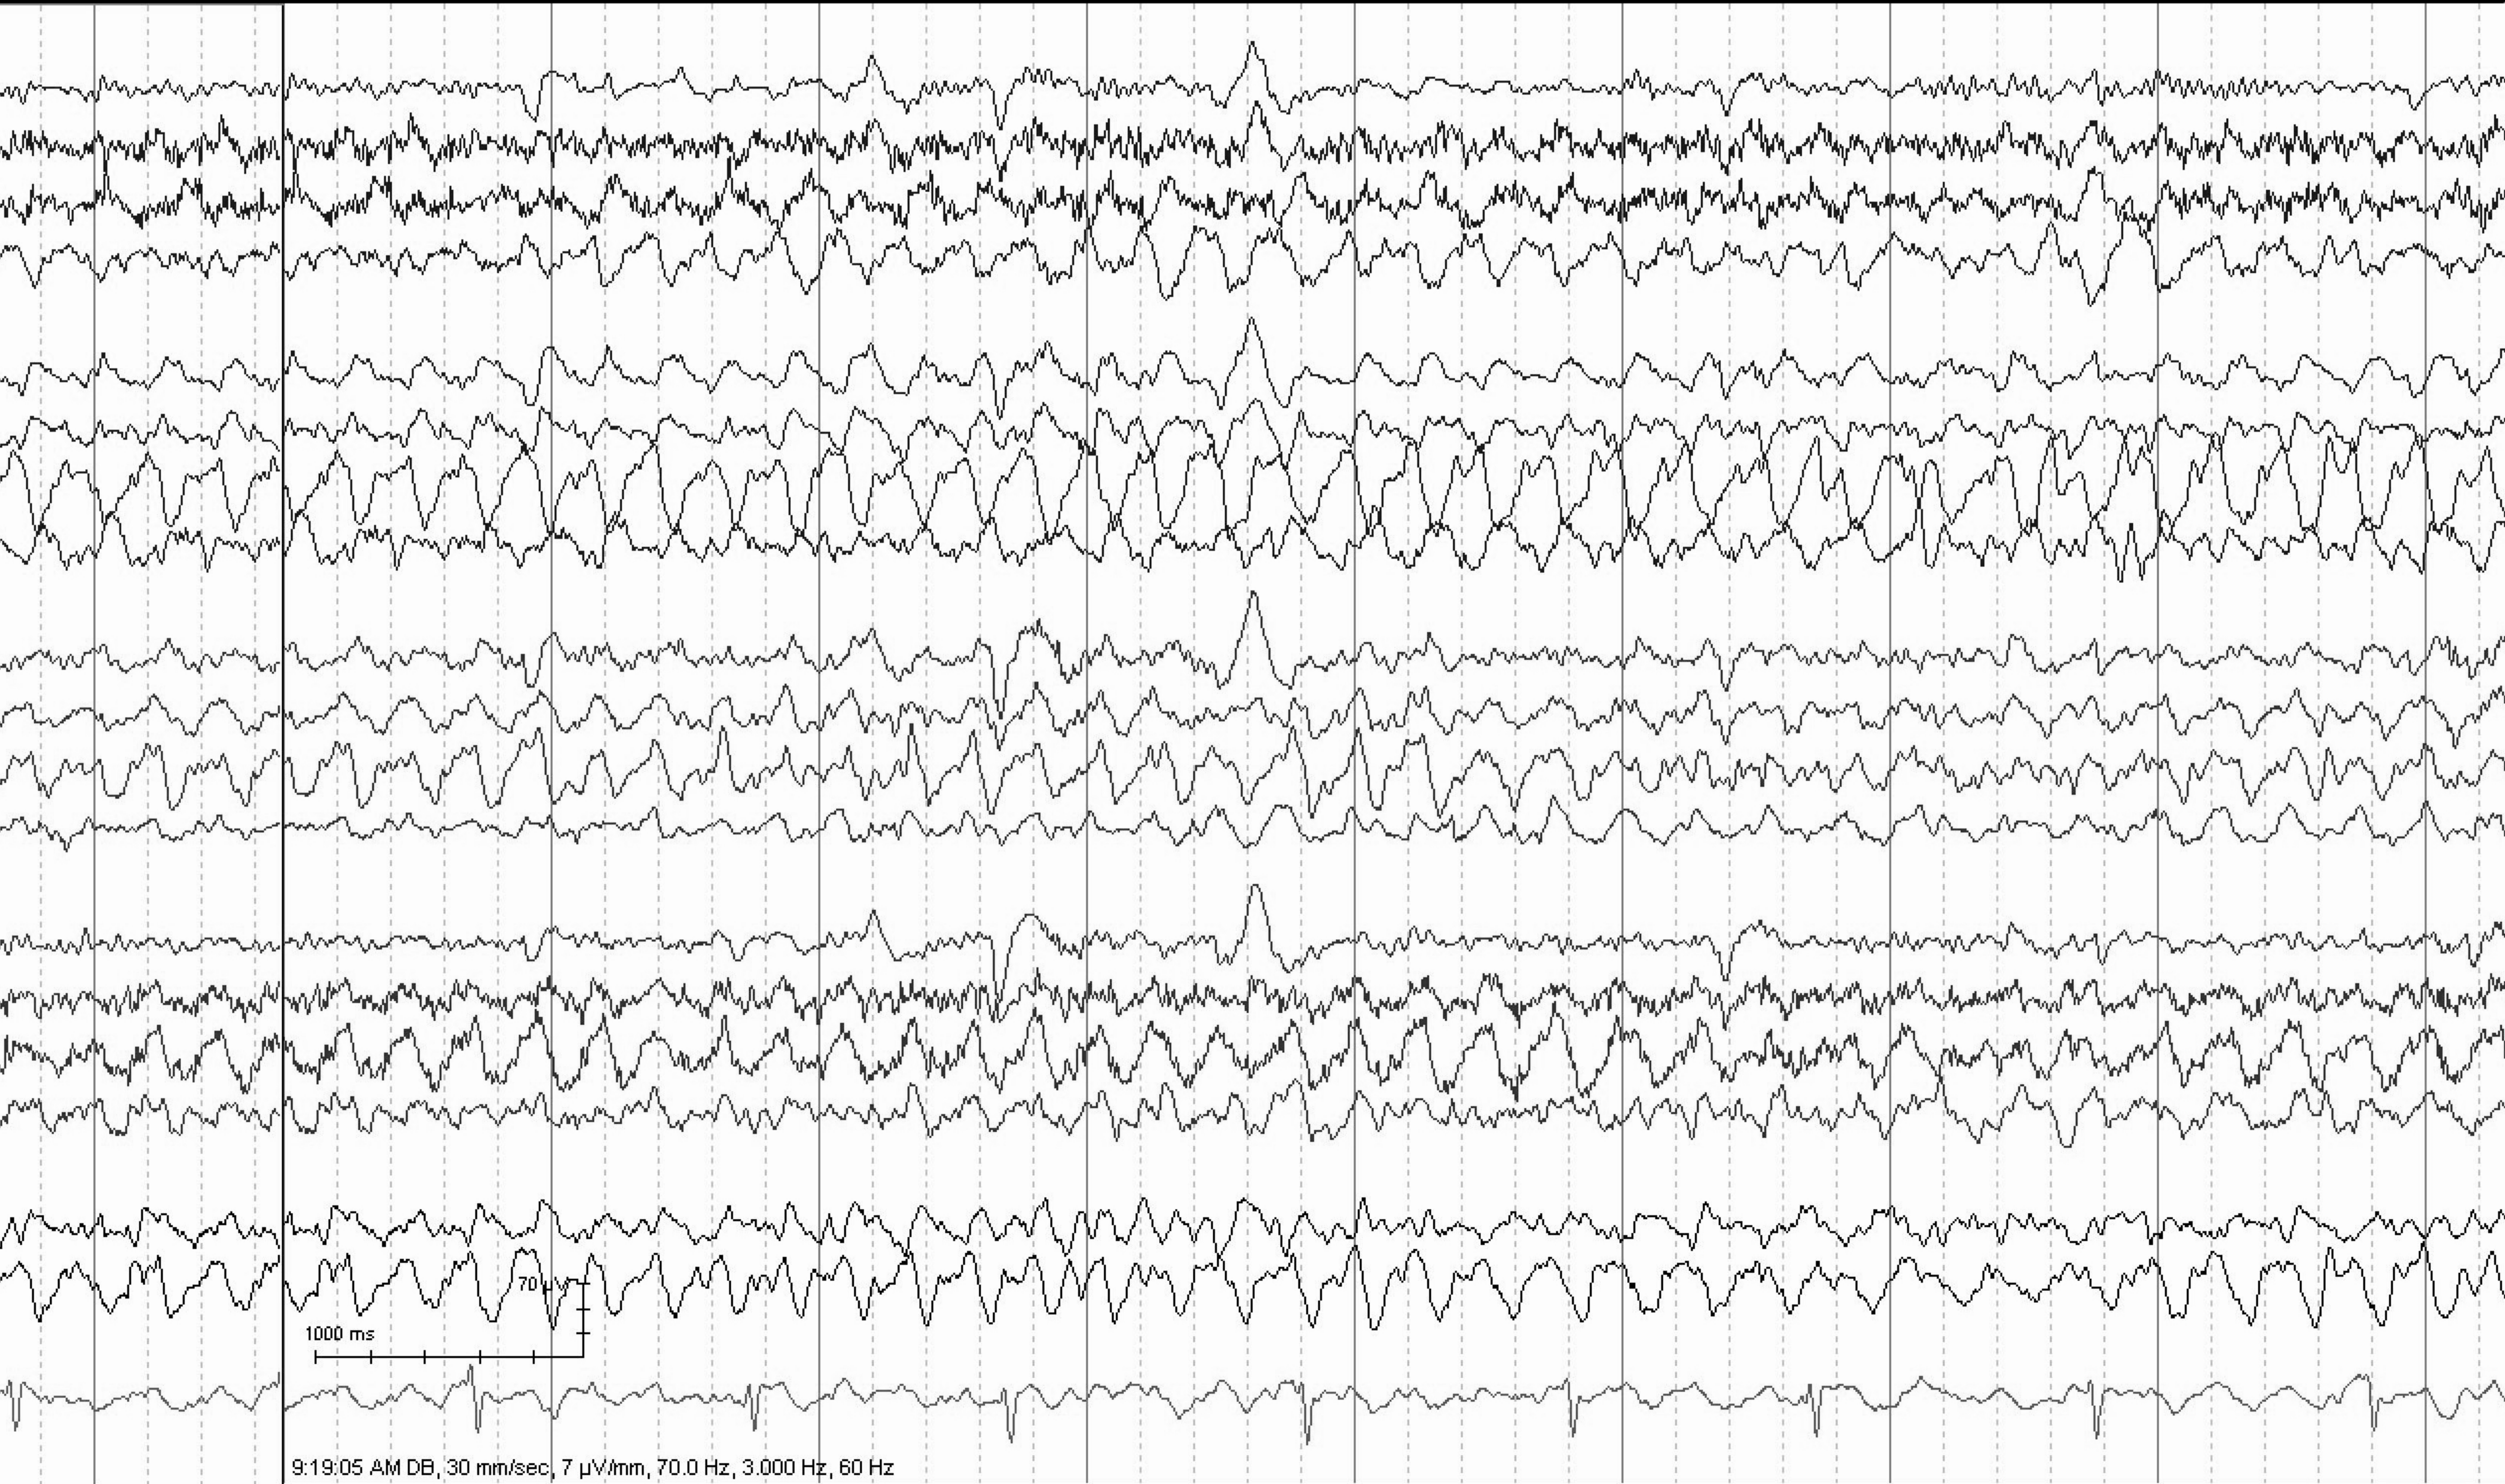

Supplement: supp_WNL.0000000000002447_Figure_e-1.pdf [file supp_WNL.0000000000002447_Figure_e-1.pdf]
